# Supplementary material for: Energetic and Monetary Analysis of Efficiency in Family-Owned Dairy Goat Production Systems in Andalusia (Southern Spain)
Source: MDPI journal article supplement (doi:10.3390/ani14010104), 2023-12-27
Supplement: s1 [file s1]

## Supplementary material

**Table S1.** General characteristics, main outputs obtained and inputs used during 2018 in the twenty-one farms monitored. IS: Indoor systems without associated crops; ISC: Indoor systems with associated crops; GS: Grazing systems with high feed supply; PS: Pastoral Systems.

| Item                                      | Unit                        | IS                  | ISC                  | GS                   | PS                  | <i>p</i>  |
|-------------------------------------------|-----------------------------|---------------------|----------------------|----------------------|---------------------|-----------|
| Number of goats                           | -                           | 388 <sup>b</sup>    | 699 <sup>a</sup>     | 254 <sup>b</sup>     | 501 <sup>ab</sup>   | *         |
| LSU <sup>(1)</sup>                        | -                           | 69.34 <sup>b</sup>  | 122.53 <sup>a</sup>  | 47.62 <sup>b</sup>   | 96.08 <sup>ab</sup> | *         |
| Grazed surfaces <sup>(2)</sup>            | ha goat <sup>-1</sup>       | 0.00 <sup>b</sup>   | 0.00 <sup>b</sup>    | 0.29 <sup>b</sup>    | 0.74 <sup>a</sup>   | ***       |
| Fodder cultivated surfaces <sup>(3)</sup> | ha goat <sup>-1</sup>       | 0.00 <sup>b</sup>   | 0.07 <sup>b</sup>    | 0.00 <sup>b</sup>    | 0.00 <sup>a</sup>   | **        |
| Total work <sup>(4)</sup>                 | AWU                         | 1.89                | 2.65                 | 1.65                 | 1.87                | <i>ns</i> |
| Hired work <sup>(4)</sup>                 | AWU                         | 0.58                | 1.00                 | 0.57                 | 0.68                | <i>ns</i> |
| Family work <sup>(4)</sup>                | AWU                         | 1.31                | 1.65                 | 1.08                 | 1.18                | <i>ns</i> |
| Work associated with activity             | goats AWU <sup>-1</sup>     | 207                 | 272                  | 164                  | 280                 | <i>ns</i> |
| <b>(a) Outputs</b>                        |                             |                     |                      |                      |                     |           |
| Milk <sup>(5)</sup>                       | litres goat <sup>-1</sup>   | 560.71 <sup>a</sup> | 474.05 <sup>a</sup>  | 492.64 <sup>a</sup>  | 309.98 <sup>b</sup> | **        |
| Meat <sup>(6)</sup>                       | kg goat <sup>-1</sup>       | 5.63                | 4.32                 | 5.41                 | 5.82                | <i>ns</i> |
| <b>(b) Inputs</b>                         |                             |                     |                      |                      |                     |           |
| Concentrates <sup>(7)</sup>               | kg goat <sup>-1</sup>       | 499.35 <sup>a</sup> | 464.53 <sup>a</sup>  | 567.92 <sup>a</sup>  | 258.21 <sup>b</sup> | **        |
| Fodder <sup>(8)</sup>                     | kg goat <sup>-1</sup>       | 490.34 <sup>a</sup> | 342.23 <sup>ab</sup> | 191.43 <sup>bc</sup> | 40.95 <sup>c</sup>  | **        |
| Electricity                               | kilowatt goat <sup>-1</sup> | 47.07               | 27.60                | 41.91                | 13.29               | <i>ns</i> |
| Petrol                                    | litres goat <sup>-1</sup>   | 5.87                | 2.91                 | 6.22                 | 2.46                | <i>ns</i> |
| Labor <sup>(9)</sup>                      | hours goat <sup>-1</sup>    | 67.31               | 49.47                | 83.77                | 48.52               | <i>ns</i> |

<sup>(1)</sup> LSU=livestock standard unit, one adult equals 0.15 LSU; rest of categories equals 0.11 LSU; <sup>(2)</sup> Grazed surfaces: all the surfaces used for goats for grazing, including cultivated or natural areas; <sup>(3)</sup> Fodder cultivated areas: areas destined to fodder supply indoors; <sup>(4)</sup> AWU: Annual Work Unit. <sup>(5)</sup> Sold milk; <sup>(6)</sup> Sold goat kids, expressed in kg of live weight; <sup>(7)</sup> Purchased concentrates, there are not cultivated concentrates; <sup>(8)</sup> includes purchased and cultivated fodder; <sup>(9)</sup> Includes hired and family work. <sup>a,b,c</sup> Values with different letters on the same row are different (\**p* < 0.05; \*\**p* < 0.01; \*\*\**p* < 0.001).

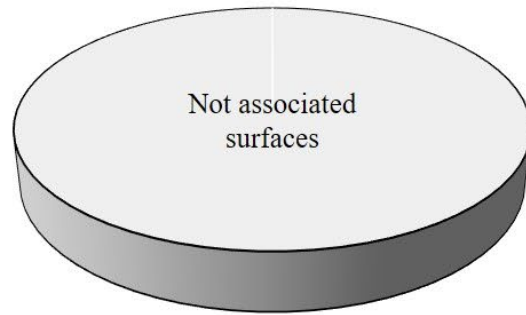

**Indoor systems (IS)**

Total área (ha): 0  
N° goats: 388.13  
LSU: 69.34

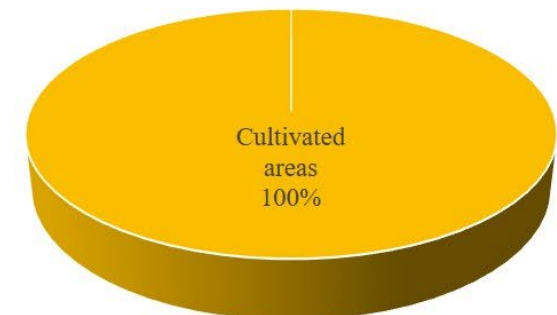

**Indoor systems with associated crops (ISC)**

Total área (ha): 23.17  
N° goats: 699.00  
LSU: 122.53

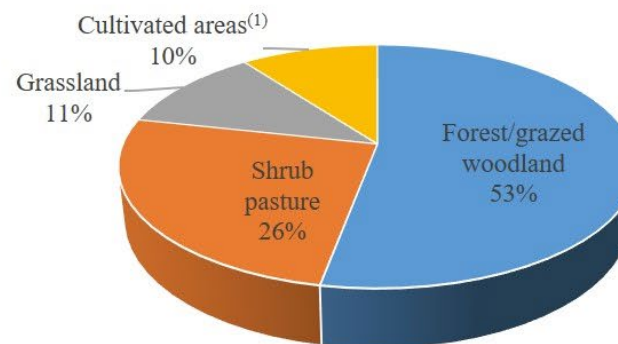

**MEAN**

Total área (ha): 96.40  
N° goats: 427.57  
LSU: 78.13

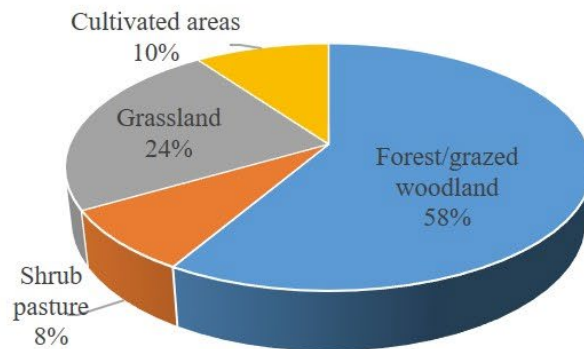

**Grazing systems with high feed supply (GS)**

Total área (ha): 73.00  
N° goats: 254.40  
LSU: 47.62

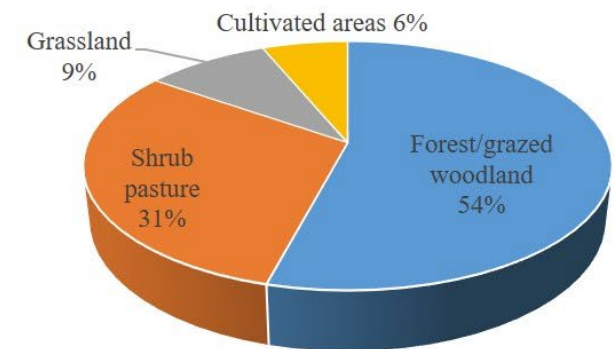

**Pastoral systems (PS)**

Total área (ha): 316.60  
N° goats: 501.00  
LSU: 96.08

**Figure S1.** Main characteristics of the surfaces used for goats in the systems using surfaces for grazing. <sup>(1)</sup> Cultivated areas: includes surfaces for grazing and/or fodder
